# Supplementary material for: CrN thin films prepared by reactive DC magnetron sputtering for symmetric supercapacitors
Source: Royal Society of Chemistry journal article supplement (doi:10.1039/c6ta09985h), 2016-12-29
Supplement: c6ta09985h1.pdf [file c6ta09985h1.pdf]

## *Supporting Information*

### **CrN Thin Film Prepared by Reactive DC Magnetron Sputtering for Symmetric Supercapacitors**

Binbin Wei,<sup>a</sup> Hanfeng Liang,<sup>\*a,b</sup> Dongfang Zhang,<sup>a</sup> Zhengtao Wu,<sup>a</sup> Zhengbing Qi,<sup>c</sup> and  
Zhoucheng Wang<sup>\*a</sup>

<sup>a</sup>Department of Chemical and Biochemical Engineering, College of Chemistry and Chemical Engineering, Xiamen University, Xiamen 361005, China

<sup>b</sup>Materials Science and Engineering, King Abdullah University of Science and Technology (KAUST), Thuwal 23955-6900, Saudi Arabia

<sup>c</sup>College of Materials Science and Engineering, Xiamen University of Technology, Xiamen 361024, China

\*E-mails: hanfeng.liang@kaust.edu.sa (H. Liang); zcwang@xmu.edu.cn (Z. Wang)

## Calculations

### For single electrode

The areal specific capacitance based on GCD curves was calculated from the following equation (1):

$$C_a = I\Delta t / (S \times \Delta U) \quad (1)$$

where  $C_a$  (mF cm<sup>-2</sup>) is the areal specific capacitance of the electrode,  $I$  (mA) is the discharge current,  $\Delta t$  (s) is the discharge time,  $\Delta U$  (V) is the potential window, and  $S$  (cm<sup>2</sup>) is the surface area of the working electrode.

The areal specific capacitance based on CV curves was calculated using the following equation (2):

$$C_a = \int_{U_a}^{U_b} I(V)dV / [2 \times v \times S \times (U_b - U_a)] \quad (2)$$

where  $C_a$  (mF cm<sup>-2</sup>) is the areal specific capacitance of the electrode,  $\int IdV$  is the integrated area of one CV cycle,  $v$  (mV s<sup>-1</sup>) is the potential sweep rate,  $S$  (cm<sup>2</sup>) is the surface area of the working electrode, and  $U_a$  (V) and  $U_b$  (V) are the lowest and the highest potentials, respectively.

### For symmetric supercapacitor device

The areal cell capacitance ( $C_a$ , mF cm<sup>-2</sup>) based on GCD curves was calculated according to the following equation (3):

$$C_a = I\Delta t / (S \times \Delta U) \quad (3)$$

Where  $I$  (mA) is the discharge current,  $\Delta t$  (s) is the discharge time,  $\Delta U$  (V) is the potential window, and  $S$  (cm<sup>2</sup>) is the total surface area of both electrodes.

The energy density and power density were concluded by the following equations (4) and (5):

$$E = \frac{1}{2} C_a \times \Delta U^2 \quad (4)$$

$$P = E / \Delta t \quad (5)$$

where  $E$  (Wh cm<sup>-3</sup>) is the specific energy density,  $P$  (W cm<sup>-3</sup>) is the specific power density,  $C_a$  (mF cm<sup>-3</sup>) is the specific capacitance of symmetric supercapacitor device,  $\Delta U$  (V) is the potential window, and  $\Delta t$  (s) is the discharge time.

## Additional Figures and Data

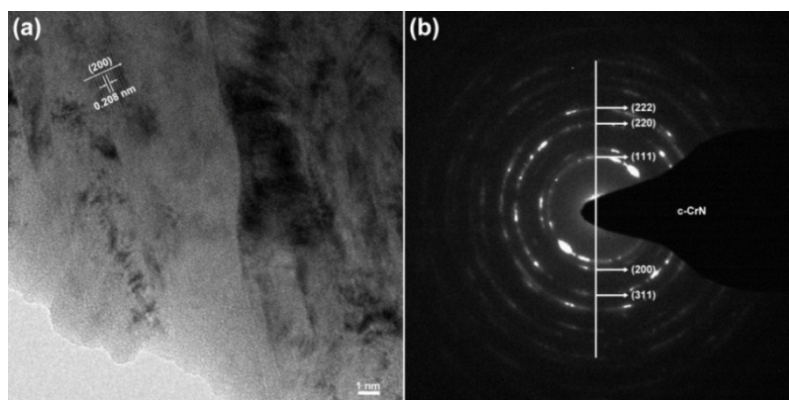

**Fig. S1** (a) The HRTEM image and (b) the corresponding SEAD pattern of T5 thin film.

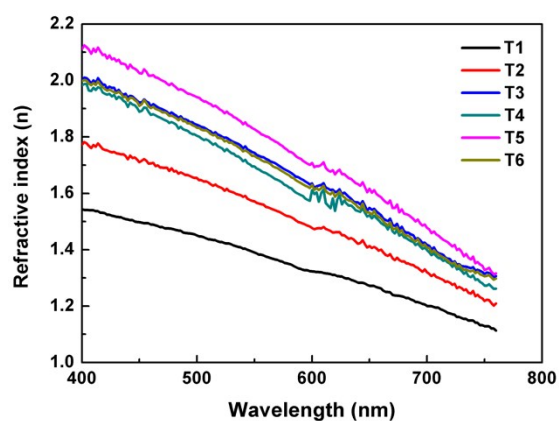

**Fig. S2** Refractive index versus the wavelength of the CrN thin films under different pressures.

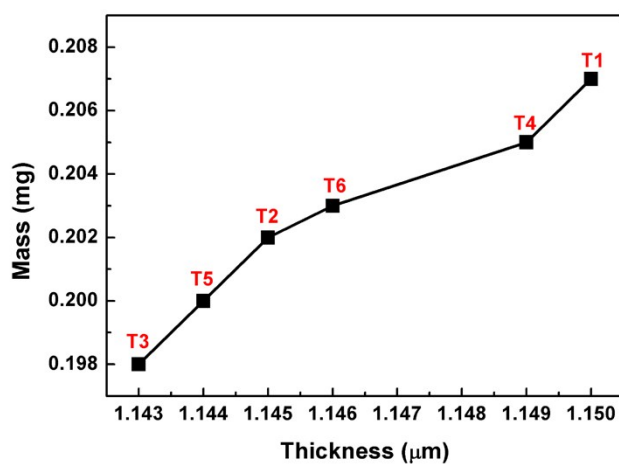

**Fig. S3** The mass plotted against the thickness of the CrN thin films fabricated under different pressures.

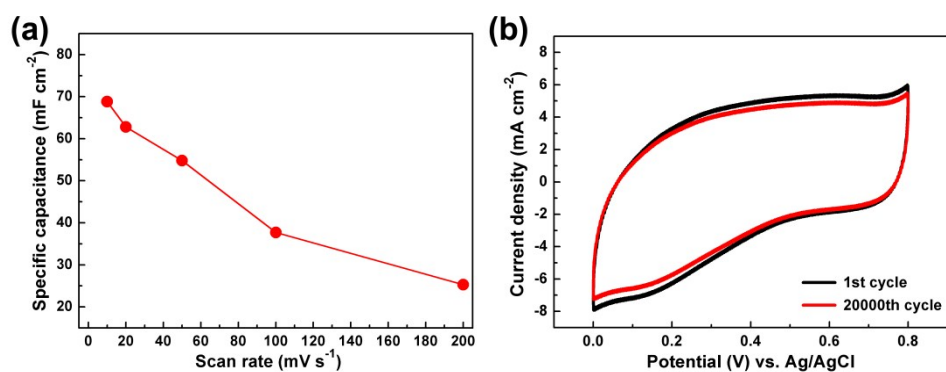

**Fig. S4** (a) Specific capacitance as a function of scan rate and (b) CV curves of the 1st and 20000th cycles at a scan rate of 200 mV s<sup>-1</sup> of T5 thin film.

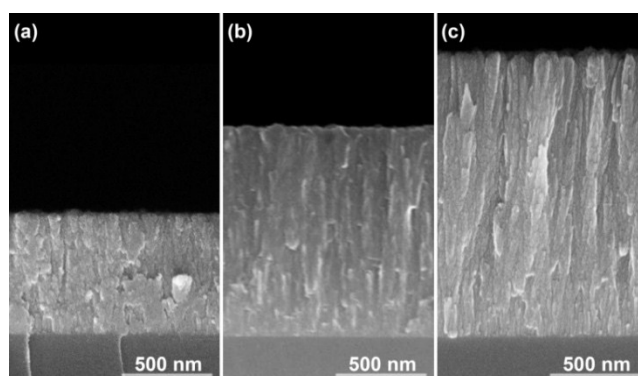

**Fig. S5** The cross-sectional SEM images of CrN thin films with different deposition times: (a) 15, (b) 30, and (c) 45 min.

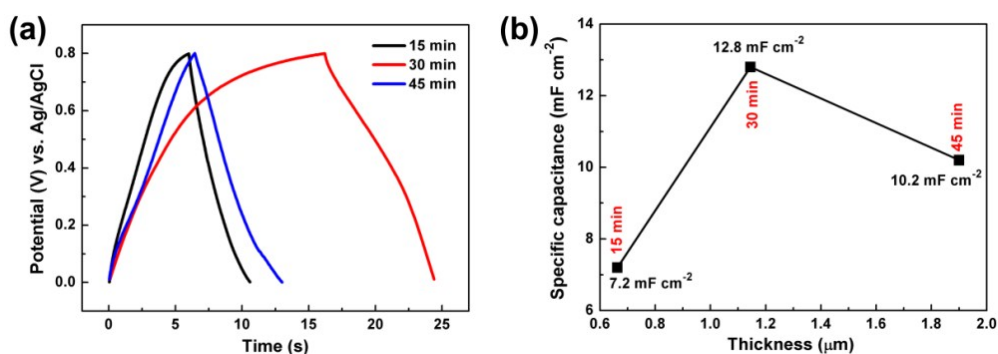

**Fig. S6** (a) GCD curves at 1.0 mA cm<sup>-2</sup> and (b) the corresponding areal capacitances of CrN thin films fabricated for different deposition times.

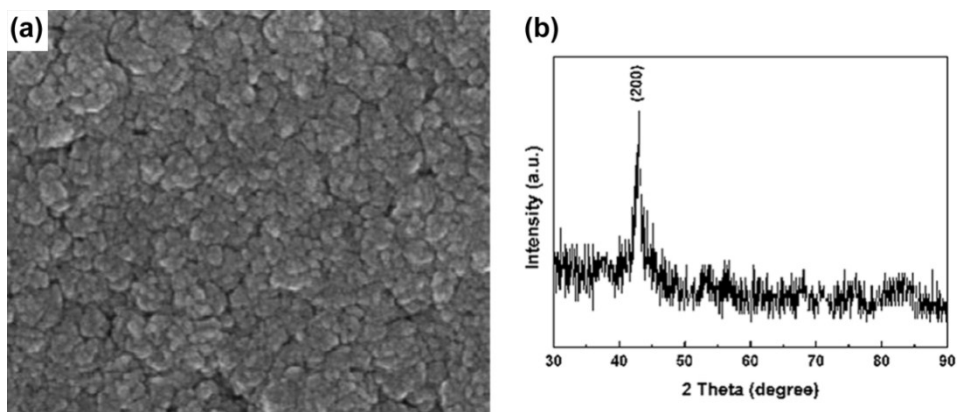

**Fig. S7** (a) SEM image and (b) XRD pattern of T5 thin film after 20000 cycles.

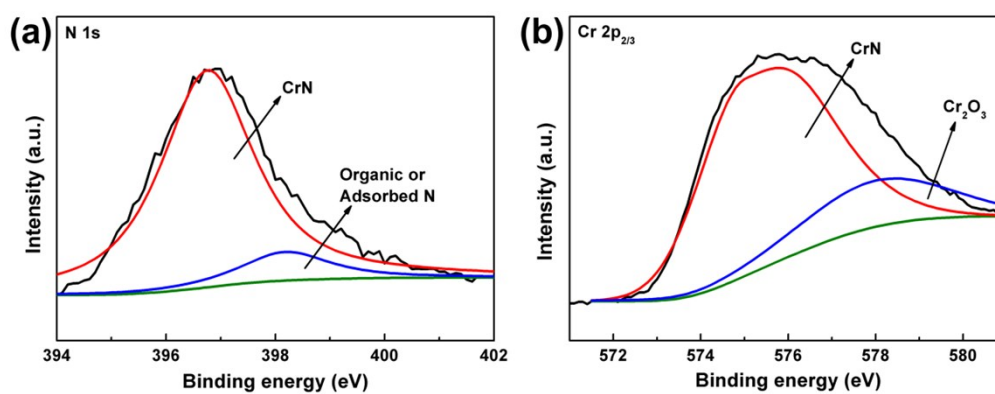

**Fig. S8** The N 1s and the Cr 2p<sub>2/3</sub> high resolution XPS spectra for T5 thin film after 20000 cycles.

## Supplementary Tables

**Table S1.** The thicknesses, mass loading, and gravimetric capacitance of CrN thin films fabricated under different pressures.

| Sample                                        | T1    | T2    | T3    | T4    | T5    | T6    |
|-----------------------------------------------|-------|-------|-------|-------|-------|-------|
| Thickness ( $\mu\text{m}$ )                   | 1.150 | 1.145 | 1.143 | 1.149 | 1.144 | 1.146 |
| Mass loading ( $\text{mg cm}^{-2}$ )          | 0.207 | 0.202 | 0.198 | 0.205 | 0.200 | 0.203 |
| Gravimetric capacitance ( $\text{F g}^{-1}$ ) | 20.3  | 28.7  | 43.4  | 48.8  | 64.0  | 36.0  |

**Table S2.** The areal specific capacitance of CrN thin films.

| Sample                                             | T1  | T2  | T3  | T4   | T5   | T6  |
|----------------------------------------------------|-----|-----|-----|------|------|-----|
| Discharge time (s)                                 | 2.7 | 3.7 | 5.5 | 6.4  | 8.2  | 4.7 |
| Areal specific capacitance ( $\text{mF cm}^{-2}$ ) | 4.2 | 5.8 | 8.6 | 10.0 | 12.8 | 7.3 |

**Table S3.** The electrical conductivity of CrN thin films.

| Sample                                         | T1   | T2   | T3   | T4   | T5   | T6   |
|------------------------------------------------|------|------|------|------|------|------|
| Electrical conductivity ( $\text{S cm}^{-1}$ ) | 2008 | 2063 | 4961 | 5068 | 6202 | 2485 |

**Table S4.** The capacitance of T5 thin film at different scan rates.

| Scan rate ( $\text{mV s}^{-1}$ )                   | 10    | 20    | 50    | 100   | 200   |
|----------------------------------------------------|-------|-------|-------|-------|-------|
| Integrated area ( $\times 10^{-4}$ )               | 8.8   | 16.1  | 35.1  | 48.3  | 64.8  |
| Areal specific capacitance ( $\text{mF cm}^{-2}$ ) | 68.8  | 62.8  | 54.8  | 37.7  | 25.3  |
| Volumetric capacitance ( $\text{F cm}^{-3}$ )      | 601.4 | 549.0 | 479.0 | 329.5 | 221.2 |
| Gravimetric capacitance ( $\text{F g}^{-1}$ )      | 343.7 | 313.7 | 273.7 | 188.3 | 126.4 |

**Table S5.** Comparison of the electrochemical performance of CrN thin films in this work with other metal nitrides.

| Nitrides                            | Specific capacitance                                                                                                                                                                                                  | Rate capability                                                         | Cycling performance      | Reference                                                     |
|-------------------------------------|-----------------------------------------------------------------------------------------------------------------------------------------------------------------------------------------------------------------------|-------------------------------------------------------------------------|--------------------------|---------------------------------------------------------------|
| CrN (T5) thin film                  | 12.8 mF cm <sup>-2</sup> at 1.0 mA cm <sup>-2</sup><br>37.7 mF cm <sup>-2</sup> (188.3 F g <sup>-1</sup> ) at 100 mV s <sup>-1</sup><br>25.3 mF cm <sup>-2</sup> (126.4 F g <sup>-1</sup> ) at 200 mV s <sup>-1</sup> | 61% (0.5-10 mA cm <sup>-2</sup> )<br>54.8% (10-100 mV s <sup>-1</sup> ) | 92.1% after 20000 cycles | This work                                                     |
| TiN thin film                       | 8.8 mF cm <sup>-2</sup> at 100 mV s <sup>-1</sup>                                                                                                                                                                     | 58.6% (10-100 mV s <sup>-1</sup> )                                      |                          | <i>J. Power Sources</i> , 2015, <b>300</b> , 525-532.         |
| VN power                            | 5.4 mF cm <sup>-2</sup> at 100 mV s <sup>-1</sup>                                                                                                                                                                     |                                                                         | 64.8% after 400 cycles   | <i>J. Phys. Chem., solids</i> , 2009, <b>70</b> , 495-500.    |
| VN film                             | 22.8 mF cm <sup>-2</sup> at 100 mV s <sup>-1</sup>                                                                                                                                                                    | 54.2% (10-100 mV s <sup>-1</sup> )                                      | 67.2% after 1000 cycles  | <i>Electrochim. Acta</i> , 2014, <b>141</b> , 203-211.        |
| RuN thin film                       | 6 mF cm <sup>-2</sup> at 200 mV s <sup>-1</sup>                                                                                                                                                                       |                                                                         |                          | <i>Scripta Mater.</i> , 2013, <b>68</b> , 659-662.            |
| TiN/CNT                             | 25.5 mF cm <sup>-2</sup> at 100 mV s <sup>-1</sup>                                                                                                                                                                    |                                                                         | 90.9% after 20000 cycles | <i>Nano Energy</i> , 2014, <b>7</b> , 104-113.                |
| WN                                  | 13 F g <sup>-1</sup> at 100 mV s <sup>-1</sup>                                                                                                                                                                        | 52.1% (10-100 mV s <sup>-1</sup> )                                      | 80% after 500 cycles     | <i>J. Am. Ceram. Soc.</i> , 2007, <b>90</b> , 3113-3120.      |
| MoN <sub>x</sub> power              | 27.2 F g <sup>-1</sup> at 100 mV s <sup>-1</sup>                                                                                                                                                                      | 24.5% (10-100 mV s <sup>-1</sup> )                                      | 60% after 500 cycles     | <i>J. Am. Ceram. Soc.</i> , 2011, <b>94</b> , 2371-2378.      |
| NbN <sub>x</sub> power              | 10.5 F g <sup>-1</sup> at 100 mV s <sup>-1</sup>                                                                                                                                                                      | 18.2% (10-100 mV s <sup>-1</sup> )                                      | 103.2% after 500 cycles  | <i>J. Am. Ceram. Soc.</i> , 2011, <b>94</b> , 2371-2378.      |
| TiN power                           | 52.3 F g <sup>-1</sup> at 100 mV s <sup>-1</sup>                                                                                                                                                                      | 22.2% (10-100 mV s <sup>-1</sup> )                                      | 27.6% after 400 cycles   | <i>J. Electrochem. Soc.</i> , 2006, <b>153</b> , A2298-A2303. |
| Porous NbN                          | 67.2 F g <sup>-1</sup> at 0.1 A g <sup>-1</sup>                                                                                                                                                                       | 30.8% (0.1-5 A g <sup>-1</sup> )                                        | 97.9% after 15000 cycles | <i>J. Mater. Chem. A</i> , 2016, <b>4</b> , 9760-9766.        |
| Nb <sub>4</sub> N <sub>5</sub>      | 225.8 mF cm <sup>-2</sup> at 0.5 mA cm <sup>-2</sup>                                                                                                                                                                  | 60.8% (0.5-10 mA cm <sup>-2</sup> )                                     | 70.9% after 2000 cycles  | <i>Adv. Sci.</i> , 2015, <b>2</b> , 1500126.                  |
| G/TiN NTA                           | 25.2 mF cm <sup>-2</sup> at 100 mV s <sup>-1</sup>                                                                                                                                                                    | 54.5% (10-100 mV s <sup>-1</sup> )                                      | 86.1% after 1000 cycles  | <i>RSC Adv.</i> , 2014, <b>4</b> , 41856-41863.               |
| Nb <sub>4</sub> N <sub>5</sub> NBAs | 30.2 mF cm <sup>-2</sup> at 1.0 mA cm <sup>-2</sup>                                                                                                                                                                   |                                                                         | 80% after 1000 cycles    | <i>Appl. Surf. Sci.</i> , 2016, <b>383</b> , 57-63.           |

**Table S6.** Cell capacitance, energy density, and power density of the CrN-based symmetric supercapacitor at different current densities.

| Current density (mA cm <sup>-2</sup> )            | 0.2  | 0.5  | 1.0  | 2.0  |
|---------------------------------------------------|------|------|------|------|
| Areal specific capacitance (mF cm <sup>-2</sup> ) | 10.6 | 7.7  | 6.5  | 5.0  |
| Volumetric capacitance (F cm <sup>-3</sup> )      | 92.7 | 67.3 | 56.8 | 43.7 |
| Specific energy density (mWh cm <sup>-3</sup> )   | 8.2  | 6.0  | 5.0  | 3.9  |
| Specific power density (W cm <sup>-3</sup> )      | 0.7  | 1.8  | 3.5  | 7.0  |
